# Supplementary material for: Outcome measures in coeliac disease trials: the Tampere recommendations
Source: PubMed Central journal article supplement — Gut. 2018 Feb 13;67(8):1410–24. doi: 10.1136/gutjnl-2017-314853 (PMC6204961; doi:10.1136/gutjnl-2017-314853), 2018-02-13
Supplement: gutjnl-2017-314853supp001.pdf [file gutjnl-2017-314853supp001.pdf]

## **Appendix.**

A description of the Grade system

Recommendations in this paper was graded according to the method suggested by the Oxford Centre or Evidence-based Medicine (Oxford Centre for Evidence-based Medicine - Levels of Evidence. Oxford university. 2009).

### **Strength of recommendations**

A - Directly based on category I evidence, e.g. from systematic reviews and randomized controlled trials. This is the strongest recommendation of the four grades listed.

B - Directly based on category II or III evidence or extrapolated recommendation from category I evidence. This includes evidence from controlled non-randomized studies or time series; or indirect evidence from systematic reviews or randomized controlled trials.

C - Directly based on category IV evidence or extrapolated recommendation from category II or III evidence. This also includes evidence from non-experimental studies such as cohort studies or case-control studies.

D - Directly based on category V evidence or inconsistent or inconclusive studies of any level. This includes evidence from expert committees and respected authorities.
